# Supplementary material for: Photo induced irreversible transformation from elastic to bent brittle crystals: Importance of reaction pathway in the irreversibility of the molecular movement
Source: Royal Society of Chemistry journal article supplement (doi:10.1039/d4ce00875h), 2024-01-01
Supplement: d4ce00875h1.pdf [file d4ce00875h1.pdf]

*Supporting information*

**Photoinduced irreversible transformation from elastic to bent brittle crystals: Importance of reaction pathway in the irreversibility of the molecular movement**

Shilpa Munthikkot,<sup>a</sup> Srinu Tothadi<sup>b</sup> and Sumy Joseph<sup>\*a</sup>

**TABLE OF CONTENTS**

|                                                                          |        |
|--------------------------------------------------------------------------|--------|
| 1. Infrared (IR) spectra analysis.....                                   | S2-S3  |
| 2. Glide plane and two-fold screw axis of symmetry.....                  | S4     |
| 3. Proton nuclear magnetic resonance analysis.....                       | S5     |
| 4. Carbon nuclear magnetic resonance analysis.....                       | S6-S7  |
| 5. Differential scanning calorimetry (DSC) analysis .....                | S7     |
| 6. Thermogravimetric (TG) and differential thermal analysis (DTA).....   | S8     |
| 7. Parallel orientation of chalcone molecules.....                       | S9     |
| 8. List of Photoinduced bending molecule through [2+2] dimerization..... | S9-S10 |
| 9. List of videos.....                                                   | S10    |

## 1. Infrared (IR) spectra analysis

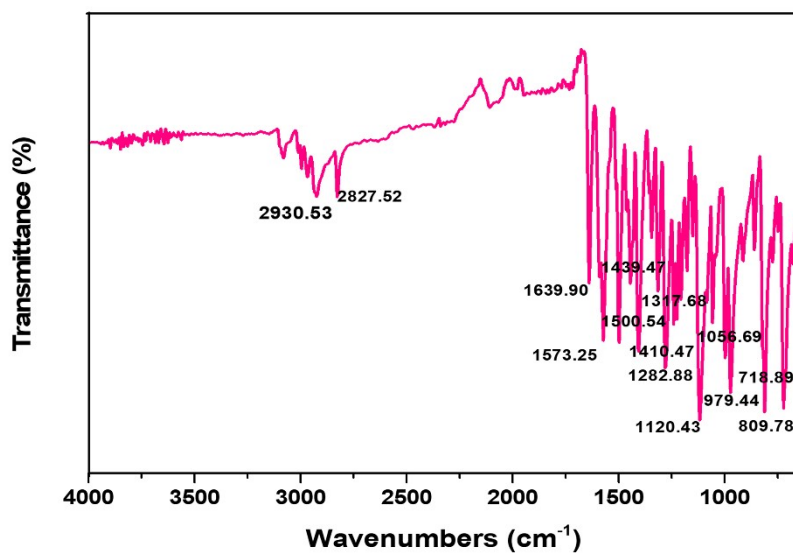

Fig. S1 IR spectra of TTMP

**Table S1.** Functional groups assignment of **TTMP**

| Frequency (cm <sup>-1</sup> ) | Assignment                   |
|-------------------------------|------------------------------|
| 2930.53                       | C-H Stretching               |
| 2827.52                       | C-H Stretching               |
| 1639.90                       | C=O Stretching               |
| 1573.25                       | C=C Aromatic stretching      |
| 1500.54                       | C=C Aromatic Stretching      |
| 1439.47                       | C=C Stretching               |
| 1410.47                       | C-H Deformation              |
| 1317.68                       | C-C Aromatic stretching      |
| 1282.88                       | C-H Bending                  |
| 1233.93                       | C-H Bending                  |
| 1120.43                       | O-CH <sub>3</sub> Stretching |
| 1056.69                       | C-O Stretching               |
| 809.78                        | C-S Bending                  |

## 2. Glide plane and two-fold screw axis of symmetry

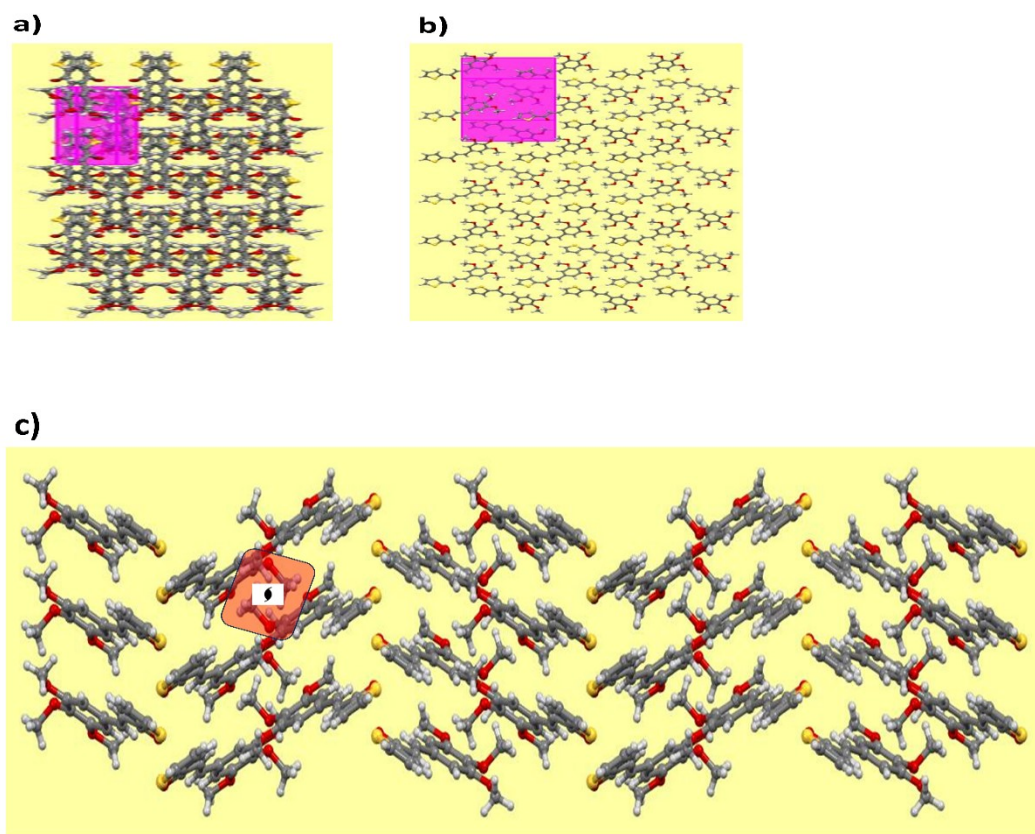

**Fig. S2** Glide plane down a) *a* crystallographic axis b) *b* crystallographic axis c) two-fold screw axis along *c* crystallographic axis

### 3. Proton nuclear magnetic resonance analysis

**Table S2.** Proton assignment of TTMP before and after sunlight exposure

| Different types of protons | Chemical shift in ppm<br>(Before sunlight exposure) | Chemical shift ppm<br>(After sunlight exposure) |
|----------------------------|-----------------------------------------------------|-------------------------------------------------|
| Aromatic proton            | 8.27                                                | 8.28                                            |
| Olefinic proton            | 8.15                                                |                                                 |
| Aromatic proton            | 8.07                                                | 8.04                                            |
| Aromatic proton            | 7.70                                                | 7.88                                            |
| Olefinic proton            | 7.66                                                |                                                 |
| Aromatic proton            | 7.58                                                | 7.54                                            |
| CDCl <sub>3</sub>          | 7.24                                                | 7.24                                            |
| Methoxy proton             | 4.32                                                | 4.94,4.79,4.71                                  |
| Cyclobutane proton         |                                                     | 5.57                                            |
| Cyclobutane proton         |                                                     | 5.46                                            |

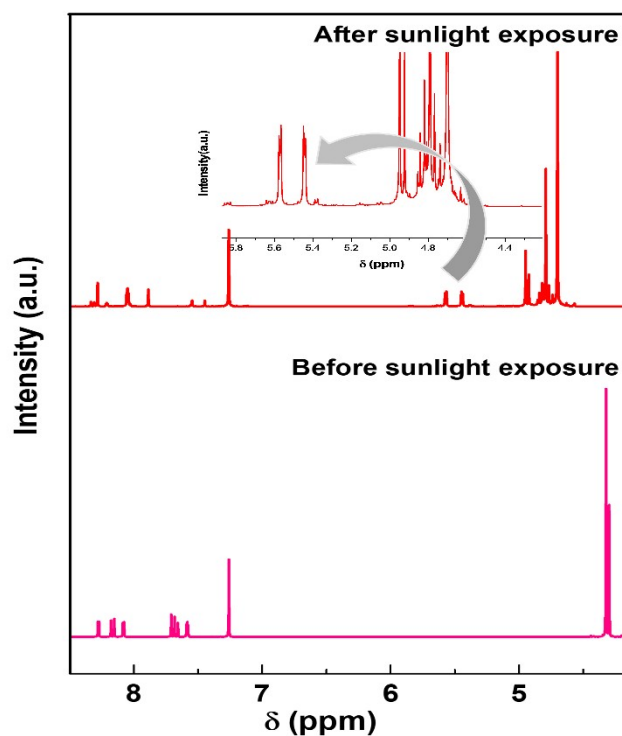

**Fig. S3** <sup>1</sup>H-NMR spectra of TTMP before and after sunlight exposure

#### 4. Carbon nuclear magnetic resonance analysis

**Table S3.** Carbon assignment of TTMP before and after sunlight exposure

| Different types of Carbon atoms | Chemical shift in ppm (Before sunlight exposure) | Chemical shift ppm (After sunlight exposure) |
|---------------------------------|--------------------------------------------------|----------------------------------------------|
| Carbonyl carbon                 | 182.94                                           | 190.00                                       |
| Aromatic carbon                 | 153.56                                           | 153.03                                       |
| Aromatic carbon                 | 145.60                                           | 145.21                                       |
| Aromatic carbon                 | 144.44                                           | 143.08                                       |
| Aromatic carbon                 | 140.99                                           | 137.12                                       |
| Aromatic carbon                 | 133.99                                           | 133.72                                       |
| Aromatic carbon                 | 131.92                                           | 131.92                                       |
| Olefinic carbon                 | 130.36                                           |                                              |
| Aromatic carbon                 | 128.27                                           | 128.09                                       |
| Olefinic carbon                 | 120.95                                           |                                              |
| Aromatic carbon                 | 105.40                                           | 105.55                                       |
| CDCl <sub>3</sub>               | 77                                               | 77                                           |
| Methoxy carbon                  | 60.75                                            | 61.10                                        |
| Methoxy carbon                  | 66.14                                            | 56.40                                        |
| Cyclobutane carbon              |                                                  | 45.83                                        |
| Cyclobutane carbon              |                                                  | 45.14                                        |

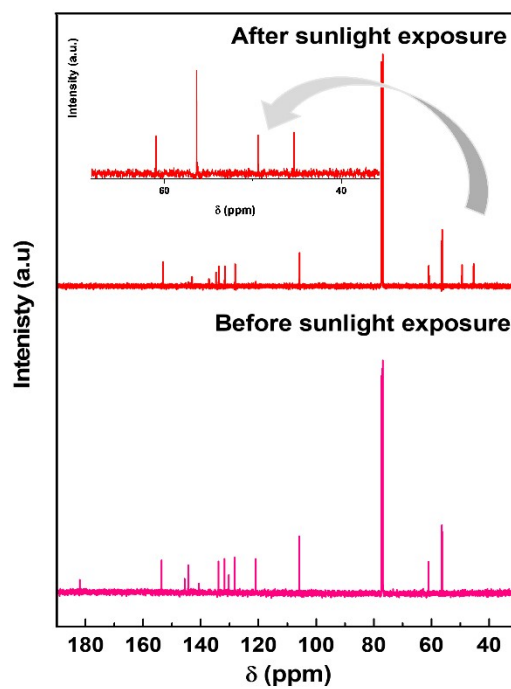

**Fig. S4** <sup>13</sup>C-NMR spectra of TTMP before and after sunlight exposure

### 5. Differential scanning calorimetry (DSC) analysis

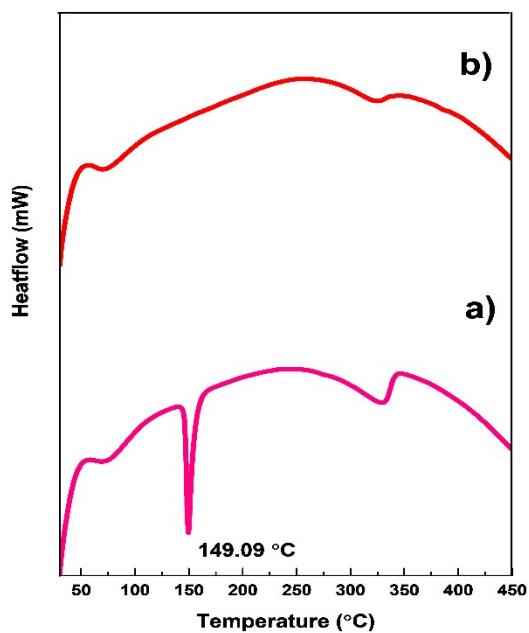

**Fig. S5** DSC curves of TTMP a) before and b) after sunlight exposure

## 6. Thermogravimetric (TG) and differential thermal analysis (DTA)

a)

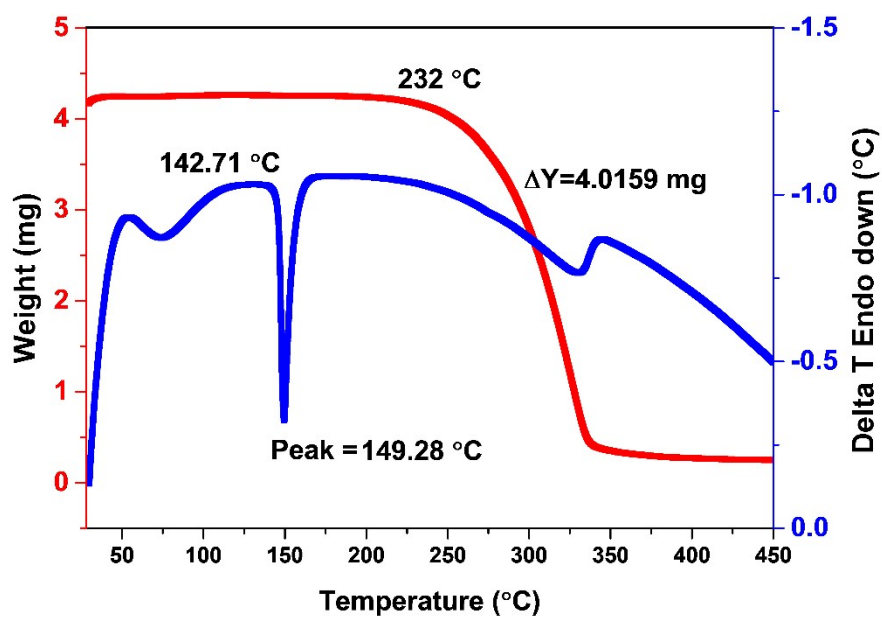

b)

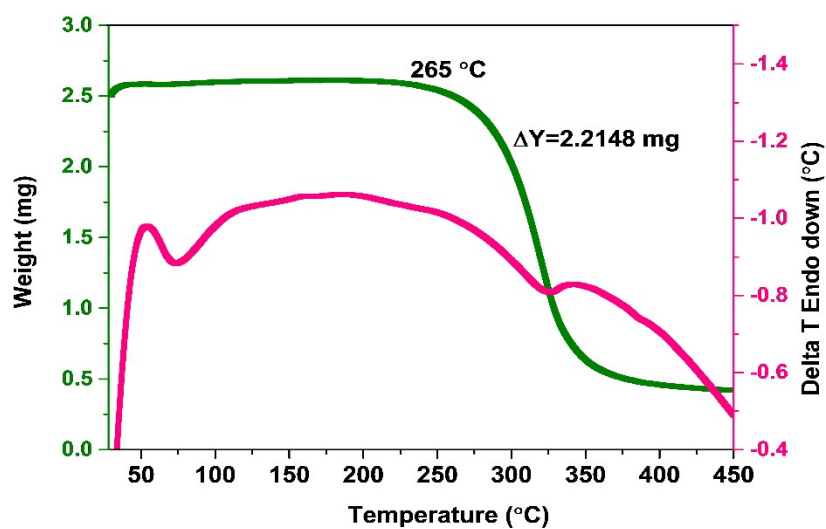

**Fig. S6** Thermogravimetric and differential thermal analysis of TTMP a) before and b) after exposure



## 7. Parallel orientation of chalcone molecules

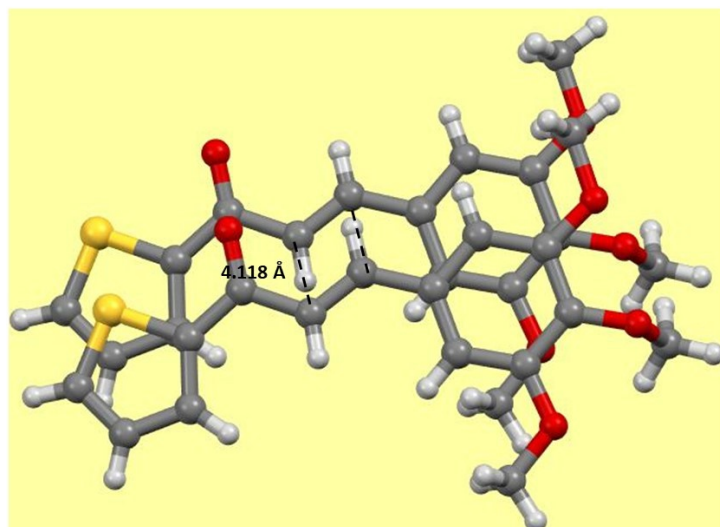

**Fig. S7** Distance between two parallelly oriented TTMP molecules

## 8. List of Photoinduced bending molecules through [2+2] dimerization

**Table S4.** List of reported photoinduced bending molecules through [2+2] dimerization

| Compound name with reference no.                                 | CCDC NO. | Elastically bending | Reversible/irreversible with respect to light/heat | Bond distance (Å) | Time taken for bending | Crystallinity of product |
|------------------------------------------------------------------|----------|---------------------|----------------------------------------------------|-------------------|------------------------|--------------------------|
| Barbiturate derivative <sup>32</sup>                             | 2258875  | Yes                 | Not analyzed                                       | 5.615             | 48 hours               | Crystalline              |
| 5-chloro-2-(naphthalenylvinyl)benzo[d]oxazole <sup>28</sup>      | 1904295  | No                  | Reversible                                         | 3.83              | 5 minutes              | Crystalline              |
| 1,2-Bis(4-pyridyl)ethylene- Based Pyridinium Salt <sup>15b</sup> | 923356   | No                  | Reversible                                         | 3.6               | 48 hours               | Crystalline              |
| 7-Methoxycoumarin <sup>15c</sup>                                 | 2061357  | No                  | Reversible                                         | 3.83              | 24 hours               | Crystalline              |

|                                                                                      |         |     |              |       |               |             |
|--------------------------------------------------------------------------------------|---------|-----|--------------|-------|---------------|-------------|
| 1-(4-bromophenyl)-3-(4-fluorophenyl)-prop-2-en-1-one <sup>19</sup>                   | 1974692 | No  | Reversible   | 4.01  | 60 minutes    | Crystalline |
| (E)-3-(3,5-difluorophenyl)-1-(4-methoxyphenyl)prop-2-en-1-one <sup>19</sup>          | 1974670 | No  | Reversible   | 3.936 | 60 minutes    | Crystalline |
| (E)-2-(2,4-dichlorostyryl)benzo[d]oxazole <sup>21</sup>                              | 1526199 | No  | Reversible   | 3.86  | 5 minutes     | Crystalline |
| cyanostilbene esters <sup>29</sup>                                                   | 1983911 | No  | Not analyzed | 4.687 | 10 minutes    | Crystalline |
| (E)-2-(4-fluorostyryl)benzo[d]oxazole <sup>30</sup>                                  | 1814882 | No  | Reversible   | 3.681 | 10 minutes    | Crystalline |
| (E)-2-(2,4-difluorostyryl)benzo[d]oxazole <sup>30</sup>                              | 1814128 | No  | Reversible   | 3.863 | 10 minutes    | Crystalline |
| (E)-2-(4-fluorostyryl)benzo[d]thiazole <sup>31</sup>                                 | 1814131 | No  | Reversible   | 3.829 | 4 minutes     | Crystalline |
| (E)-2-(2,4-difluorostyryl)benzo[d]thiazole <sup>31</sup>                             | 1814889 | No  | Reversible   | 3.822 | 4 minutes     | Crystalline |
| (Z)-2-(3,5-bis(trifluoromethyl)phenyl)-3-(naphthalen-2-yl)acrylonitrile <sup>7</sup> | 2032920 | Yes | Reversible   | 3.607 | 30 minutes    | Crystalline |
| 1,3-dimethylbarbituric acid <sup>33</sup>                                            | 2332071 | No  | Reversible   | 3.621 | 12 hours      | Crystalline |
| (E)-4-fluorocinnamaldehyde malononitrile <sup>27</sup>                               | 1973164 | No  | Irreversible | 3.376 | Not specified | Amorphous   |

## 9. List of Videos

**Video S1-** Mechanical bending of TTMP Crystal before sunlight exposure

**Video S2-** Breaking of TTMP crystal after sunlight exposure on the application of mechanical force
